# Supplementary material for: Gold Coast Health Emergency Department load share initiative: Impact on capacity creation, and the experiences of those receiving and delivering care
Source: Research Square preprint supplement (doi:10.21203/rs.3.rs-6323389/v1), 2025-06-02
Supplement: Supplementary file 1 [file 32d303aaedf40ac2e544e2a7.docx]

Survey Questions – Patients

These questions are about the experience you recently had as a patient being cared for in the Emergency Department and inpatient facilities at [Gold Coast Private Hospital/ Pindara Private Hospital/ John Flynn Private Hospital].

**Q01**  Overall, how would you rate the care you / your child received in the emergency department ?

- 1. Very good
  2. Good
  3. Adequate
  4. Poor
  5. Very poor

**Q02** Did you feel you were / your child was treated with respect and dignity while in the emergency department?

1. Yes, always
2. Yes, sometimes
3. No

**Q03** Did the healthcare professionals caring for you / your child explain things in a way you could understand?

*Healthcare professionals includes all healthcare staff involved in your care.*

1. Yes, always
2. Yes, sometimes
3. No

**Q04** Were you involved as much as you wanted to be in decisions about your / your child's care and treatment?

1. Yes, definitely
2. Yes, to some extent
3. No, not enough

**Q05** Were you / Was your child ever in pain while at the hospital?

1. Yes, was in pain in hospital
2. No pain

**Q05.1** Do you think the healthcare professionals did everything they could to help manage your / your child's pain?

1. Yes, definitely
2. Yes, to some extent
3. No

**Q06** Did you have confidence and trust in the healthcare professionals treating you / your child?

1. Yes, always
2. Yes, sometimes
3. No

**Q07** Did you feel the healthcare professionals looking after you / your child worked well together?

1. Yes, definitely
2. Yes, to some extent
3. No

**Q08** In your opinion, how clean was the emergency department ?

1. Very clean
2. Fairly clean
3. Not very clean
4. Not at all clean

**Q09** Where did you / your child go after leaving the hospital?

1. Transferred to another hospital
2. Went home / to stay with a relative or friend
3. Other

**Q10** Thinking about when you / your child left the emergency department , were you given information that prepared you to manage your / their care?

1. Yes, definitely
2. Yes, to some extent
3. No, was not given enough information
4. No, did not understand the information

**Q11** Are you / Is your child of Aboriginal and/or Torres Strait Islander origin?

1. Not Aboriginal and/or Torres Strait Islander
2. Yes, Aboriginal
3. Yes, Torres Strait Islander
4. Yes, both Aboriginal and Torres Strait Islander
5. Prefer not to say

**Q12 If Yes to above -** Were you/ they offered support from an Aboriginal and Torres Strait Islander health worker or hospital liaison officer?

1. Yes
2. No, but did not want or need to see one
3. No, but would have liked to be asked

**Q13 If Yes to Q11 -** Did the hospital have any culturally appropriate resources available?

*These may be things like books, posters or brochures, the Aboriginal and Torres Strait Islander flags displayed, or staff wearing shirts with cultural artwork.*

1. Yes
2. No

**Q14** Was there anything really good about the care you / your child received in the emergency department?

1. Yes
2. No

**Q14a** Please specify what was really good about the care received at the hospital:

*Show if Q14 = 1 – There was something really good*

**Q15** Was there anything about the care you / your child received in the emergency department that could be improved?

1. Yes
2. No

Please specify what could be improved about the care received at the hospital:

Thank you.

The information collected will help to improve hospital services.

If you would be willing to provide more feedback, there are additional questions about other aspects of the care you / your child received that will take about 10 minutes to complete.

**E1** Would you be willing to complete additional questions about the care you received at the private hospital?

1. Yes
2. No

***In Hospital – Additional Feedback***

**Q16** Thank you for choosing to provide additional feedback. The following questions are still about your stay in the [insert name of private hospital].

If you / your child needed assistance, were you able to get a member of staff to help you / them within a reasonable timeframe?

1. Always
2. Mostly
3. Sometimes
4. Rarely
5. Never

**Q17** Did you / your child have any concerns about the food during your / their hospital stay?

1. No, did not have any concerns about the food
2. Yes, had concerns about the food
3. Wanted food but was not offered any (Go to Q20)
4. Did not have any food for medical reasons (Go to Q20)
5. Did not want or need any food (Go to Q20)

**Q18** What was it about the food that concerned you / you or your child?

*Select all that apply*

1. Quantity
2. Temperature
3. Unappetising
4. Timeliness
5. Did not meet dietary requirements
6. Poor quality / Not nutritious / Not healthy / Not fresh
7. Not appropriate for health condition
8. Limited choice / Lack of variety
9. Not given enough time
10. Didn’t allow for absences
11. Problems with order / Didn’t arrive
12. Other

**Q19** Did you feel you needed help from staff to eat your meals? / Did your child need help from staff to eat any meals?

1. Yes, needed help
2. No did not need help

**Q19.1** Did you / your child receive the help you / they needed?

1. Yes, always
2. Yes, sometimes
3. No

**Q20** Did you ever have questions to ask a healthcare professional?

1. Yes, had questions
2. No questions (Go to Q21)

**Q20.1** When you had questions to ask a healthcare professional, did you get answers that could help you to understand?

1. Yes, always
2. Yes, sometimes
3. No

**Q21** How much information about your / your child’s condition or treatment was given to you?

1. The right amount
2. Too much
3. Not enough

**Q22** Did you have worries or fears about your / your child’s condition or treatment while in hospital?

1. Yes, had worries or fears
2. No worries or fears (Go to Question 23.1)

**Q23** Did a healthcare professional discuss your worries or fears with you?

1. Yes, completely
2. Yes, to some extent
3. No

**Q23.1** Were you / you and your child given enough privacy when discussing your / their care or being examined or treated?

1. Yes, always
2. Yes, sometimes
3. No

**Q23.2** Did you / your child have any particular cultural or spiritual needs while at the hospital?

*This may be things like food, space to pray, whether the healthcare professional was a man or a woman, and so on.*

1. Yes, had cultural or spiritual needs
2. No cultural or spiritual needs (Go to Q26a)

**Q24** Were these cultural or spiritual needs met?

1. Yes, completely
2. Yes, to some extent
3. No (go to 24a)

**Q24a** Please specify what cultural or spiritual needs were not met:

**Q25** Did the hospital have any culturally or spiritually appropriate resources available, such as books, posters or brochures?

1. Yes
2. No

**Q26a** Were you / your child at any point of your stay transferred to another hospital if yes proceed to following questions – if no thank you for your time and end survey here.

**Q26** If you said that when you / your child left the private hospital you were transferred to another hospital.

Were you / your child included in the process of making the decision about being transferred from one hospital to the other hospital?

1. Yes

No (go to Q28)

**Q27** Was your family, carer, or someone close to you informed about your transfer?

1. Yes
2. No
3. There was no need

**Q28** Did a healthcare professional tell you who to contact if you were worried about your / your child’s condition or treatment after leaving hospital?

1. Yes
2. No

**Q29** Did a healthcare professional tell you what warning signs to watch for after leaving hospital?

1. Yes, completely
2. Yes, to some extent
3. No
4. It was not necessary

**Q30** Before you / your child left hospital, were any new medications prescribed for you?

1. Yes, new medication
2. No new medication (go to Q35)

**Q31** Were you told how you were / your child was to take the new medications in a way you could understand?

1. Yes, definitely
2. Yes, to some extent
3. No

**Q32** Did a healthcare professional explain the purpose of the new or changed medications you / your child was to take after leaving hospital in a way you could understand?

1. Yes, completely
2. Yes, to some extent
3. No

**Q33** Did a healthcare professional tell you about medication side effects to watch for?

1. Yes, completely
2. Yes, to some extent
3. No

**Q34** Were you given clear written or printed information about the new or changed medications?

1. Yes, completely
2. Yes, to some extent
3. No

**Q35** Did a healthcare professional take your family or home situation into account when planning your / your child’s discharge?

1. Yes, completely
2. Yes, to some extent
3. No
4. It was not necessary

**Q36** Did a healthcare professional discuss with you whether you / your child would need any additional equipment in your home, or any adaptations made to your home, after leaving hospital?

1. Yes
2. No, but would have liked them to
3. No, it was not necessary to discuss it

**Q37** Did a healthcare professional discuss with you whether you / your child may need any further health or social care services after leaving hospital?

*This includes things like services from a GP, physiotherapist or community nurse, or assistance from social services or a voluntary organisation.*

1. Yes
2. No, but would have liked them to
3. No, it was not necessary to discuss it

**Q38** Were adequate arrangements made by a healthcare professional for any services you / your child needed after leaving hospital?

1. Yes, completely
2. Yes, to some extent
3. No, arrangements were not adequate
4. Did not need any services

**Q38.1** At the end of your / your child’s time in hospital, were you / they referred to a specialist or other healthcare provider for further care?

1. Yes, referred for further care
2. Not referred for further care (go to end)

**Q39** Were you included in the process of making the decisions about the referral?

1. Yes, completely
2. Yes, to some extent
3. No, but would have liked to be
4. No, but it was not necessary

End of survey: Thank you for your time to complete this survey. We highly value your feedback.

If you have any concerns about your care or treatment at {insert hospital} please contact the hospital directly. Please contact your GP or health care provider if you have any other health concerns

GCHHS Staff Survey – ED GCUH

1. Are you aware of the Emergency Department Load Share initiative?

[If no] *Researcher to explain EDLS and the number of patients who have been diverted.*

[if yes, *Follow-up question:* What do you understand to be its purpose?]

1. The EDLS began in October last year. Since then, have you noticed any changes to patient flow through the ED?

[Prompt to answer: ‘Some issues related to patient flow include the size of demand, available capacity, crowding and ramping’].

1. In your observations, has the EDLS impacted GCH staff and the wider health service in other ways? If so, how?

[Prompt to answer: ‘Have you noticed any changes to your workload’?]

1. In your observations, how satisfied have other GCH staff been in undertaking duties that support the EDLS?
2. [if applicable] What is your experience of the co-ordination process from identification of eligible patients to their arrival at ED?
3. [if applicable] What is your experience of exchanging patient clinical information with other hospitals and the QAS?

[Prompt to answer: ‘Is there anything that is working well and/or could be improved in these information flows’?]

1. In your observations, how satisfied have other GCH staff been in undertaking duties that support the EDLS?

[Prompt to elaborate: ‘How have you made these observations?’]

1. In your observations, how satisfied have EDLS patients been with the care they received?

[Prompt to answer: ‘Have you received positive or negative comments from patients?’] [Prompt to elaborate: ‘How have you made these observations?’]

1. In your observations, how satisfied have QAS staff diverting EDLS patients been in undertaking their duties?

[Prompt to elaborate: ‘How have you made these observations?’]

1. In your observations, how satisfied have staff from our EDLS private health partners been in undertaking their duties?

[Prompt to elaborate: ‘How have you made these observations?’]

1. Do you have any other reflections on the EDLS initiative?

[Prompt to elaborate: ‘What is working well, and what are the areas you would want to see improved’?]

[Prompt to elaborate: ‘Are there any alternative or additional strategies that you think would improve flow through the ED’?]

1. That’s the end of the questions, unless you think there is anything else that I should know or if you have any questions of me?

QAS Staff Survey

1. Are you aware of the Emergency Department Load Share initiative?

[If no] *Researcher to explain EDLS and the number of patients who have been diverted.*

[if yes, *Follow-up question:* What do you understand to be its purpose?]

1. The EDLS began in October last year. Since then, have you noticed any changes to patient flow between QAS and Gold Coast EDs?

[Prompt to answer: ‘Some issues related to patient flow include the time it takes to move a patient off a stretcher, rates of ramping’?

1. What is your experience of the co-ordination process from identification of eligible patients to their arrival at ED?
2. In your observations, are there any ways that the EDLS has impacted QAS staff and the wider ambulance/ health service?

[Prompt to answer: ‘Have you noticed any changes to your workload’?]

1. In your observations, how satisfied have other QAS staff been in undertaking duties that support the EDLS?

[Prompt to elaborate: ‘How have you made these observations?’]

1. In your observations, how satisfied have EDLS patients been with the care they received?

[Prompt to answer: ‘Have you received positive or negative comments from patients?’]

[Prompt to answer: ‘When offered the option, are there any common questions or reservations from patients?]

[Prompt to elaborate: ‘How have you made these observations?’]

1. In your observations, how satisfied have Gold Coast Health staff diverting EDLS patients been in undertaking their duties? Do you think it’s having an impact at GCH? If yes, in what ways?

[Prompt to elaborate: ‘How have you made these observations?’]

1. In your observations, how satisfied have staff from our EDLS private health partners been in undertaking their duties?

[Prompt to answer: ‘Is the demand on private partners manageable’?]

[Prompt to elaborate: ‘How have you made these observations?’]

1. Do you have any other reflections on the EDLS initiative?

[Prompt to elaborate: ‘What is working well, and what are the areas you would want to see improved’?]

[Prompt to elaborate: ‘Are there any alternative or additional strategies that you think would improve flow through the ED’?]

1. That’s the end of the questions, unless you think there is anything else that I should know or if you have any questions of me?

PHO Staff Survey

1. Are you aware of the Emergency Department Load Share initiative?

[If no] *Researcher to explain EDLS and the number of patients who have been diverted.*

[if yes, *Follow-up question:* What do you understand to be its purpose?]

1. The EDLS began in October last year. Since then, have you noticed any changes to patient flow through the ED?

[Prompt to answer: ‘Some issues related to patient flow include the size of demand, available capacity, crowding or ramping’].

1. In your observations, how has the EDLS impacted staff in your ED and the wider health service?

[Prompt to answer: ‘Have you noticed any changes to your workload’?]

1. What is your experience of the co-ordination process from identification of eligible patients to their arrival at ED?
2. What is your experience of exchanging patient clinical information with other hospitals and the QAS?
3. In your observations, how satisfied have other staff in your hospital been in undertaking duties that support the EDLS?

[Prompt to answer: ‘Is the demand on private partners manageable’?]

[Prompt to elaborate: ‘How have you made these observations?’]

1. In your observations, how satisfied have EDLS patients been with the care they received?

[Prompt to answer: ‘Have you received positive or negative comments from patients?’] [Prompt to elaborate: ‘How have you made these observations?’]

1. In your observations, how satisfied have QAS staff diverting EDLS patients been in undertaking their duties?

[Prompt to elaborate: ‘How have you made these observations?’]

1. Do you have any other reflections on the EDLS initiative?

[Prompt to elaborate: ‘What is working well, and what are the areas you would want to see improved’?]

[Prompt to elaborate: ‘Are there any alternative or additional strategies that you think would improve flow through the ED’?]

1. That’s the end of the questions, unless you think there is anything else that I should know or if you have any questions of me?
